# Supplementary material for: Discovering Relations Between Mind, Brain, and Mental Disorders Using Topic Mapping
Source: PubMed Central journal article supplement (PMC3469446; doi:10.1371/journal.pcbi.1002707), 2012-10-11
Supplement: pcbi.1002707.s001.pdf [file pcbi.1002707.s001.pdf]

**Table S1.** Complete list of topics identified through application of latent Dirichlet allocation to the text corpus filtered for Cognitive Atlas terms. The top 5 words shown for each topic are those which had the highest loading for that topic across documents. The number of documents that loaded on each topic is also listed.

| Topic | Ndocs | Terms                                                                                       |
|-------|-------|---------------------------------------------------------------------------------------------|
| 46    | 948   | search, visual_search, attention, conjunction_search, focus                                 |
| 74    | 769   | auditory, perception, hearing, attention, listening                                         |
| 19    | 615   | fixation, attention, movement, focus, goal                                                  |
| 14    | 614   | association, context, learning, attention, memory                                           |
| 88    | 608   | focus, attention, association, context, knowledge                                           |
| 43    | 566   | attention, focus, visual_attention, fixation, attentional_resources                         |
| 86    | 519   | decision, decision_making, choice, fixation, uncertainty                                    |
| 6     | 510   | knowledge, semantic_knowledge, association, context, focus                                  |
| 20    | 497   | action, movement, goal, context, perception                                                 |
| 93    | 495   | emotion, valence, arousal, attention, focus                                                 |
| 90    | 494   | inhibition, response_inhibition, attention, motor_inhibition, fixation                      |
| 120   | 483   | judgment, fixation, movement, decision, knowledge                                           |
| 31    | 481   | perception, attention, visual_perception, focus, integration                                |
| 102   | 476   | action, goal, knowledge, encoding, reading                                                  |
| 47    | 446   | imagery, mental_imagery, visual_imagery, perception, auditory_imagery                       |
| 89    | 444   | action, movement, perception, integration, manipulation                                     |
| 61    | 442   | memory, working_memory, maintenance, visual_working_memory, spatial_working_memory          |
| 105   | 437   | emotion, sadness, context, happiness, attention                                             |
| 11    | 432   | attention, sustained_attention, executive_control, memory, monitoring                       |
| 116   | 430   | action, action_selection, monitoring, focus, context                                        |
| 8     | 419   | cognitive_control, monitoring, attention, performance_monitoring, goal                      |
| 129   | 418   | cognition, social_cognition, communication, theory_of_mind, context                         |
| 128   | 409   | movement, focus, attention, fixation, goal                                                  |
| 107   | 401   | language, language_processing, language_acquisition, language_production, learning          |
| 92    | 394   | attention, spatial_attention, fixation, movement, selective_attention                       |
| 106   | 391   | movement, coordination, motor_control, feedback, planning                                   |
| 3     | 389   | memory, episodic_memory, recall, learning, verbal_memory                                    |
| 111   | 386   | memory, working_memory, attention, spatial_working_memory, cognitive_load                   |
| 29    | 382   | learning, error_signal, rule, goal, association_learning                                    |
| 118   | 379   | integration, multisensory, crossmodal, unisensory, multisensory_integration                 |
| 68    | 377   | movement, feedback, search, attention, lying                                                |
| 70    | 377   | memory, working_memory, efficiency, cognition, association                                  |
| 4     | 374   | cognition, recognition, memory, social_cognition, object_recognition                        |
| 62    | 367   | reading, language, recognition, focus, fixation                                             |
| 44    | 356   | risk, decision, utility, decision_making, monitoring                                        |
| 64    | 354   | retrieval, memory, memory_retrieval, episodic_memory, encoding                              |
| 13    | 349   | language, comprehension, language_processing, meaning, semantic_processing                  |
| 100   | 344   | choice, decision, utility, reward, decision_making                                          |
| 124   | 341   | feedback, learning, reward, focus, monitoring                                               |
| 39    | 340   | valence, arousal, fixation, context, salience                                               |
| 82    | 336   | meaning, subordinate, context, semantic_processing, language                                |
| 112   | 335   | context, social_context, integration, encoding, learning                                    |
| 21    | 334   | interference, interference_resolution, cognitive_control, attention, proactive_interference |
| 33    | 327   | memory, retrieval, autobiographical_memory, memory_retrieval, episodic_memory               |
| 41    | 327   | rule, rule_learning, context, learning, goal                                                |
| 9     | 321   | executive_function, attention, memory, working_memory, inhibition                           |
| 101   | 318   | recognition, memory, retrieval, pattern_recognition, focus                                  |
| 69    | 317   | concept, conceptualization, knowledge, meaning, indignation                                 |
| 109   | 312   | manipulation, maintenance, object_manipulation, movement, focus                             |
| 15    | 303   | reward, anticipation, feedback, learning, movement                                          |
| 94    | 294   | reward, decision, association, learning, choice                                             |
| 30    | 293   | logic, task_set, task_switching, goal, fixation                                             |
| 52    | 290   | retrieval, memory, memory_retrieval, retrieval_cue, encoding                                |
| 73    | 289   | arousal, attention, focus, excitement, context                                              |
| 58    | 289   | emotion, facial_expression, recognition, emotion_recognition, fear                          |
| 87    | 289   | semantic_processing, semantic_information, retrieval, knowledge, meaning                    |
| 7     | 286   | encoding, memory, episodic_memory, retrieval, strategy                                      |
| 83    | 286   | effort, cognitive_effort, attentional_effort, effortful_processing, efficiency              |
| 51    | 283   | learning, sequence_learning, motor_learning, category_learning, motor_sequence_learning     |
| 79    | 282   | familiarity, recognition, memory, context, encoding                                         |
| 113   | 282   | encoding, memory, retrieval, recognition, focus                                             |
| 60    | 279   | auditory, speech_production, perception, speech_perception, language                        |
| 78    | 274   | movement, motor_control, motor_execution, association, motor_program                        |
| 36    | 274   | memory, explicit_memory, declarative_memory, encoding, implicit_memory                      |
| 77    | 274   | mood, induction, emotion, sadness, happiness                                                |
| 76    | 272   | planning, motor_planning, movement_planning, motor_execution, goal                          |
| 97    | 271   | awareness, consciousness, insight, attention, association                                   |
| 53    | 268   | goal, context, goal_state, manipulation, knowledge                                          |
| 122   | 267   | attention, selective_attention, divided_attention, attention_shift, inattention             |
| 63    | 264   | monitoring, coordination, misattribution, context, effort                                   |
| 65    | 264   | recall, humor, memory, retrieval, association                                               |
| 18    | 262   | lying, deception, knowledge, executive_control, focus                                       |
| 55    | 262   | recognition, object_recognition, word_recognition, object_identification, chunk             |
| 37    | 261   | recognition, face_recognition, fixation, familiarity, attention                             |
| 24    | 260   | strategy, mental_arithmetic, focus, chunking, knowledge                                     |
| 125   | 256   | skill, learning, procedural_learning, skill_learning, skill_acquisition                     |
| 85    | 256   | inference, knowledge, context, search, integration                                          |
| 67    | 255   | maintenance, distraction, memory, working_memory, active_maintenance                        |

|     |     |                                                                            |
|-----|-----|----------------------------------------------------------------------------|
| 34  | 254 | perception,face_perception,fixation,apparent_motion,color_perception       |
| 28  | 254 | saliency,response_selection,manipulation_goal,choice                       |
| 49  | 251 | fear,emotion,attention,perception,context                                  |
| 98  | 248 | stress,association,feedback,risk,mental_arithmetic                         |
| 0   | 247 | priming,decision,fixation,judgment,implicit_memory                         |
| 26  | 243 | comprehension,language,sentence_comprehension,language_comprehension,irony |
| 2   | 241 | adaptation,fixation,attention,priming,context                              |
| 59  | 240 | intelligence,morphology,fluid_intelligence,association,memory              |
| 50  | 235 | listening,auditory,melody,perception,hearing                               |
| 32  | 231 | naming,retrieval,paraphasia,lexical_retrieval,phonemic_paraphasia          |
| 42  | 229 | focus,cueing,cue_validity,attention,spatial_cueing                         |
| 12  | 225 | pain,perception,attention,inhibition,association                           |
| 45  | 207 | intention,prospective_memory,introspection,attention,intentionality        |
| 17  | 205 | verbal_fluency,word_generation,articulation,language,word_repetition       |
| 10  | 205 | rehearsal_memory,updating,working_memory,maintenance                       |
| 38  | 204 | categorization,prototype,fixation,category_learning,memory                 |
| 96  | 196 | context,context_memory,framing,focus,rule                                  |
| 117 | 196 | anticipation,feedback,association,reward,context                           |
| 127 | 191 | memory,encoding,forgetting,emotional_memory,recognition                    |
| 66  | 185 | language,syntactic_processing,comprehension,syntax,sentence_processing     |
| 72  | 182 | reading,language,skill,orthography,fixation                                |
| 99  | 181 | facial_expression,emotional_expression,perception,fixation,fear            |
| 119 | 179 | competition,context,conflict_detection,manipulation,interference           |
| 40  | 178 | fear,generalization,learning,association,awareness                         |
| 115 | 171 | rhythm,action,learning_encoding,imagery                                    |
| 5   | 169 | word_frequency,decision,lexicon,reading,language                           |
| 91  | 169 | navigation,egocentric,movement,cognitive_map,memory                        |
| 84  | 167 | gaze,attention,perception,movement,context                                 |
| 23  | 165 | pain,search,perception,distraction,cognitive_load                          |
| 110 | 161 | reasoning,deductive_reasoning,memory,knowledge,working_memory              |
| 104 | 157 | feedback,auditory_feedback,auditory,movement,monitoring                    |
| 75  | 156 | retention,consolidation,memory,memory_consolidation,movement               |
| 126 | 153 | automaticity,routine,learning,attention,interference                       |
| 103 | 149 | prosody,mental_rotation,intonation,perception,attention                    |
| 80  | 149 | expertise,attitude,prejudice,familiarity,stereotypes                       |
| 123 | 142 | stress,induction,memory,arousal,context                                    |
| 22  | 142 | uncertainty,conversation,decision,monitoring,arousal                       |
| 16  | 138 | pain,perception,movement,manipulation,context                              |
| 54  | 137 | desire,habit,reward,association,decision                                   |
| 1   | 136 | belief,theory_of_mind,reasoning,intention,fixation                         |
| 81  | 128 | hearing,auditory,perception,speech_processing,communication                |
| 25  | 127 | memory,source_memory,encoding,recognition,decision                         |
| 108 | 127 | empathy,pain,theory_of_mind,awareness,facial_expression                    |
| 114 | 124 | acuity,grapheme,constancy,excitation,perception                            |
| 57  | 120 | semantic_memory,imageability,memory,knowledge,semantic_category            |
| 71  | 115 | narrative,discourse,comprehension,memory,discourse_processing              |
| 56  | 114 | expectancy,attention,arousal,focus,anticipation                            |
| 27  | 89  | analogy,reasoning,analogical_reasoning,integration,creative_thinking       |
| 121 | 68  | regret,surprise,reasoning,arousal,learning                                 |
| 95  | 51  | attachment,emotion,grief,association,sadness                               |
| 35  | 44  | hallucination,auditory,audition,language,association                       |
| 48  | 41  | metaphor,meaning,comprehension,irony,language                              |
