# Supplementary material for: Discovering Relations Between Mind, Brain, and Mental Disorders Using Topic Mapping
Source: PLoS Comput Biol. 2012 Oct 11;8(10):e1002707. doi: 10.1371/journal.pcbi.1002707 (PMC3469446; doi:10.1371/journal.pcbi.1002707)
Supplement: Table S2 — Complete list of topics identified through application of latent Dirichlet allocation to the text corpus filtered for mental disorder terms. The top 5 words shown for each topic are those which had the highest loading for that topic across documents. The number of documents that loaded on each topic is also listed. (PDF) [file pcbi.1002707.s002.pdf]

**Table S2.** Complete list of topics identified through application of latent Dirichlet allocation to the text corpus filtered for mental disorder terms. The top 5 words shown for each topic are those which had the highest loading for that topic across documents. The number of documents that loaded on each topic is also listed.

| Topic | Ndocs | Terms                                                                                                         |
|-------|-------|---------------------------------------------------------------------------------------------------------------|
| 12    | 245   | drug_abuse,gambling,alcoholic_intoxication,antisocial_personality_disorder                                    |
| 11    | 242   | aphasia                                                                                                       |
| 21    | 235   | drug_abuse,alzheimers_disease,heroin_related_disorder,phobia                                                  |
| 1     | 212   | schizophrenia,drug_abuse                                                                                      |
| 13    | 212   | depressive_disorder,major_depressive_disorder,drug_abuse,bipolar_disorder,anxiety_disorder                    |
| 14    | 199   | drug_abuse,conduct_disorder,alcoholism,antisocial_personality_disorder,cannabis_related_disorder              |
| 16    | 197   | schizophrenia                                                                                                 |
| 17    | 192   | alcoholism,alexia                                                                                             |
| 25    | 190   | anxiety_disorder,panic_disorder,phobia,obsessive_compulsive_disorder,agoraphobia                              |
| 6     | 189   | schizophrenia,tic_disorder,mood_disorder                                                                      |
| 2     | 188   | schizophrenia,psychotic_disorder,paranoid_disorder,drug_abuse,amphetamine_related_disorder                    |
| 5     | 188   | obsessive_compulsive_disorder,drug_abuse,tourettes_disorder,post_traumatic_stress_disorder,bipolar_disorder   |
| 4     | 187   | psychotic_disorder,paranoid_disorder,schizophrenia,affective_psychotic_disorder,schizoid_personality_disorder |
| 24    | 185   | dyslexia,specific_language_impairment                                                                         |
| 20    | 181   | attention_deficit_disorder,conduct_disorder,tourettes_disorder,adjustment_disorder                            |
| 18    | 181   | schizophrenia,psychotic_disorder,paranoid_disorder,cannabis_related_disorder                                  |
| 22    | 171   | gambling,drug_abuse,impulse_control_disorder                                                                  |
| 15    | 170   | attention_deficit_disorder                                                                                    |
| 3     | 159   | schizophrenia,paranoid_schizophrenia,obesity                                                                  |
| 23    | 156   | autism,specific_language_impairment                                                                           |
| 7     | 154   | bipolar_disorder,schizophrenia,mood_disorder,cyclothymic_disorder,alcoholism                                  |
| 28    | 151   | borderline_personality_disorder,drug_abuse,post_traumatic_stress_disorder,alcoholism,panic_disorder           |
| 27    | 148   | autism,asperger_syndrome,specific_language_impairment                                                         |
| 19    | 147   | autism,asperger_syndrome,capgras_syndrome                                                                     |
| 26    | 143   | phobia,eating_disorder,agoraphobia,panic_disorder,impulse_control_disorder                                    |
| 0     | 142   | mood_disorder,parkinsons_disease,huntingtons_disease,seasonal_affective_disorder                              |
| 10    | 136   | amnesia,alzheimers_disease,korsakoff_syndrome,wernicke_encephalopathy,trichotillomania                        |
| 8     | 114   | obesity,cocaine_related_disorder,drug_abuse,eating_disorder,alcoholism                                        |
| 9     | 112   | schizophrenia,schizotypal_personality_disorder,paranoid_personality_disorder                                  |
